# Supplementary material for: Targeting REDV peptide functionalized polycationic gene carrier for enhancing the transfection and migration capability of human endothelial cells
Source: Royal Society of Chemistry journal article supplement (doi:10.1039/c4tb02019g), 2015-01-01
Supplement: c4tb02019g1.pdf [file c4tb02019g1.pdf]

## **Supplementary Information**

### **Targeting REDV peptide functionalized polycationic gene carrier for enhancing the transfection and migration capability of human endothelial cells**

Haixia Wang<sup>1,2</sup>, Yakai Feng<sup>1,2,3,4\*</sup>, Jing Yang<sup>1,2</sup>, Jintang Guo<sup>1\*</sup> and Wencheng Zhang<sup>5\*</sup>

<sup>1</sup>School of Chemical Engineering and Technology, Tianjin University, Weijin Road 92, Tianjin 300072, China

<sup>2</sup>Collaborative Innovation Center of Chemical Science and Chemical Engineering (Tianjin), Weijin Road 92, Tianjin 300072, China.

<sup>3</sup>Key Laboratory of Systems Bioengineering of Ministry of Education, Tianjin University, Weijin Road 92, Tianjin 300072, China

<sup>4</sup>Tianjin University-Helmholtz-Zentrum Geesthacht, Joint Laboratory for Biomaterials and Regenerative Medicine, Weijin Road 92, Tianjin 300072, China

<sup>5</sup>Department of Physiology and Pathophysiology, Logistics University of Chinese People's Armed Police Force, Tianjin 300162, China

#### **\* Formal correspondence authors at:**

School of Chemical Engineering and Technology, Tianjin University, Weijin Road 92, Tianjin 300072, China

Email: jtguo@tju.edu.cn

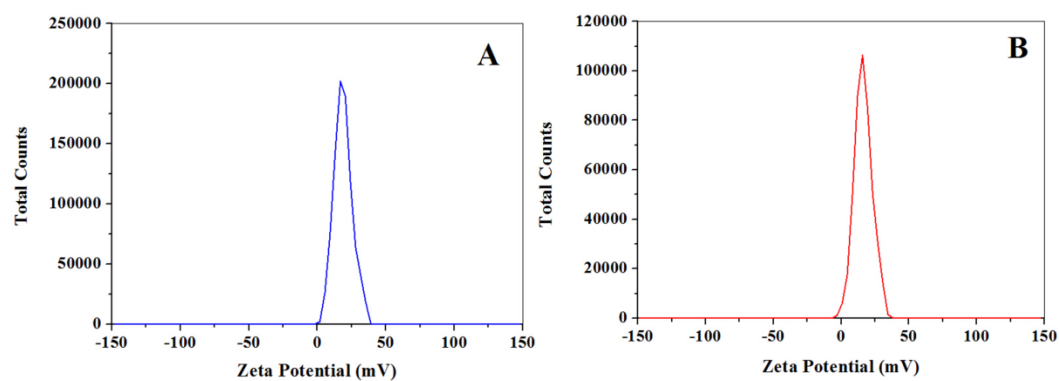

**Figure S1** Zeta potentials of NP (A) and REDV-NP (B), the samples were prepared in PBS (pH = 7.4, 0.1 M).

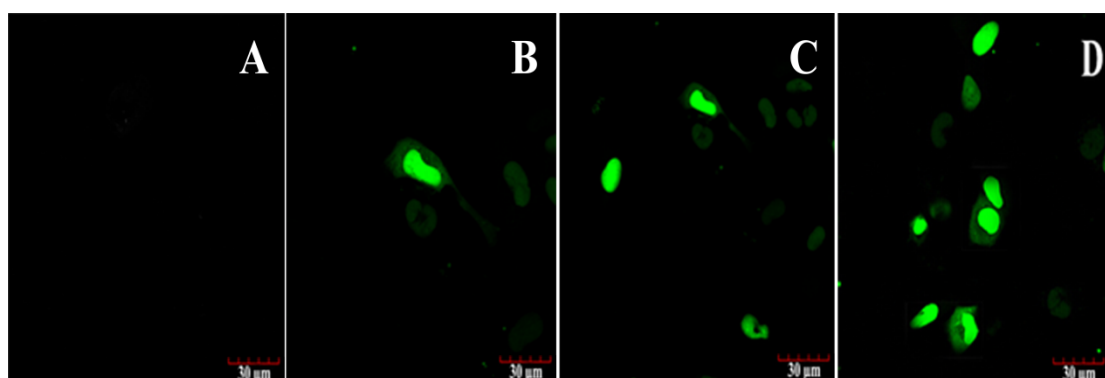

**Figure S2** The fluorescence images of EA.hy926 cells mediated by REDV-NP/pZNF580 complexes at the N/P molar ratio of 10 for incubating 0 h (A), 6 h (B), 12 h (C), 24 h (D).

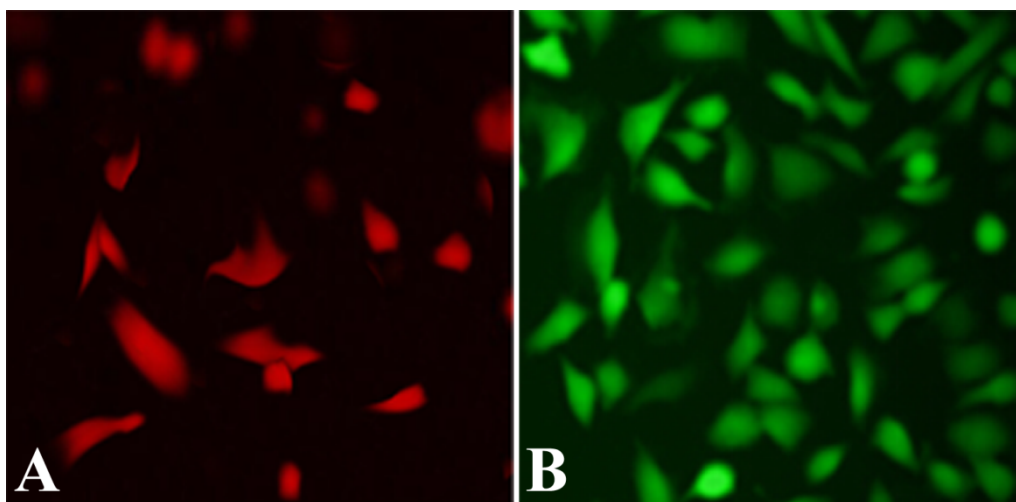

**Figure S3** Fluorescence micrographs of SMCs (A) and ECs (B) with REDV-NP/pZNF580 complexes after 24 h co-culture, image of SMCs marked by  $\alpha$ -SMA (red), image of ECs marked by FITC (green).
